# Supplementary material
Source: PubMed Central journal article supplement (PMC7799389)
Supplement: NIHMS1612520-supplement-1.pdf [file NIHMS1612520-supplement-1.pdf]

## Supplementary Tables

|                    | Firing position   | $a_{\text{accel}}$<br>(mm/s <sup>2</sup> ) | $a_{\text{decel}}$<br>(mm/s <sup>2</sup> ) | $v_{\text{max}}$<br>(mm/s) |
|--------------------|-------------------|--------------------------------------------|--------------------------------------------|----------------------------|
| <b>Condition 1</b> | high fire (2 cam) | 5,000                                      | 20,000                                     | 1,000                      |
| <b>Condition 2</b> | high fire (2 cam) | 10,000                                     | 20,000                                     | 1,000                      |
| <b>Condition 3</b> | high fire (2 cam) | 20,000                                     | 20,000                                     | 1,000                      |
| <b>Condition 4</b> | low fire (1 cam)  | 10,000                                     | 20,000                                     | 1,000                      |

**Supplementary Table 1:** Motion profile settings for four example plunge conditions

|                    | $t_0$ to $t_{\text{disp-1}}$<br>(ms) | $t_0$ to $t_{\text{disp-2}}$<br>(ms) | $t_0$ to $t_{\text{mix}}$<br>(ms) | $t_{\text{disp-1}}$ to $t_e$<br>(ms) | $t_{\text{mix}}$ to $t_e$<br>(ms) |
|--------------------|--------------------------------------|--------------------------------------|-----------------------------------|--------------------------------------|-----------------------------------|
| <b>Condition 1</b> | 85                                   | 96                                   | 102                               | 176                                  | 159                               |
| <b>Condition 2</b> | 60                                   | 68                                   | 72                                | 151                                  | 139                               |
| <b>Condition 3</b> | 42                                   | 48                                   | 51                                | 144                                  | 135                               |
| <b>Condition 4</b> | 114                                  | 119                                  | 122                               | 97                                   | 89                                |

**Supplementary Table 2:** Elapsed times for key portions of the plunge path

|                    | $v_{\text{disp-1}}$<br>(mm/s) | $v_{\text{samp-1}}$<br>(mm/s) | $v_{\text{disp-2}}$<br>(mm/s) | $v_{\text{mix}}$<br>(mm/s) |
|--------------------|-------------------------------|-------------------------------|-------------------------------|----------------------------|
| <b>Condition 1</b> | 424                           | 458                           | 479                           | 509                        |
| <b>Condition 2</b> | 600                           | 648                           | 678                           | 721                        |
| <b>Condition 3</b> | 849                           | 917                           | 960                           | 1000*                      |
| <b>Condition 4</b> | 1000*                         | 1000*                         | 1000*                         | 1000*                      |

**Supplementary Table 3:** Grid velocities at specified time points of the plunge path

|                    | $t_{\text{disp-1}}$<br>(ms) | $t_{\text{samp-1}}$<br>(ms) | $t_{\text{disp-2}}$<br>(ms) | $t_{\text{mix}}$<br>(ms) |
|--------------------|-----------------------------|-----------------------------|-----------------------------|--------------------------|
| <b>Condition 1</b> | 0                           | 6.8                         | 11.1                        | 17.1                     |
| <b>Condition 2</b> | 0                           | 4.8                         | 7.8                         | 12.1                     |
| <b>Condition 3</b> | 0                           | 3.4                         | 5.5                         | 8.6                      |
| <b>Condition 4</b> | 0                           | 3.0                         | 5.0                         | 8.0                      |

**Supplementary Table 4:** Elapsed times from  $t_{\text{disp-1}}$  timepoint
